# Supplementary material for: Facile formation of a nanostructured NiP2@C material for advanced lithium-ion battery anode using adsorption property of metal–organic framework
Source: Royal Society of Chemistry journal article supplement (doi:10.1039/c6ta02059c), 2016-01-01
Supplement: c6ta02059c1.pdf [file c6ta02059c1.pdf]

## Supporting Information

### **Facile formation of a nanostructured NiP<sub>2</sub>@C material for advanced lithium-ion battery anode by using adsorption properties of metal-organic frameworks**

Gaihua Li,<sup>a</sup> Hao Yang,<sup>a</sup> Fengcai Li,<sup>a</sup> Jia Du,<sup>a</sup> Wei Shi<sup>\*ab</sup> and Peng Cheng<sup>\*ab</sup>

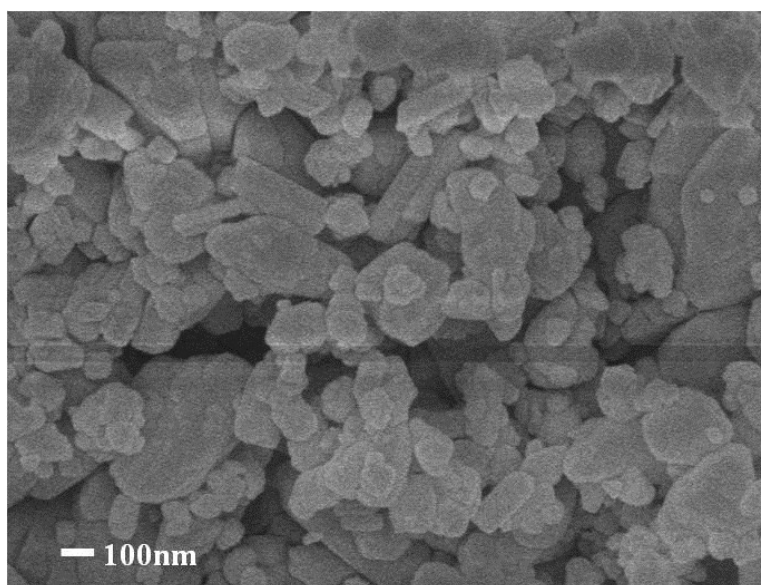

Fig. S1 FESEM images of Ni-MOF-74

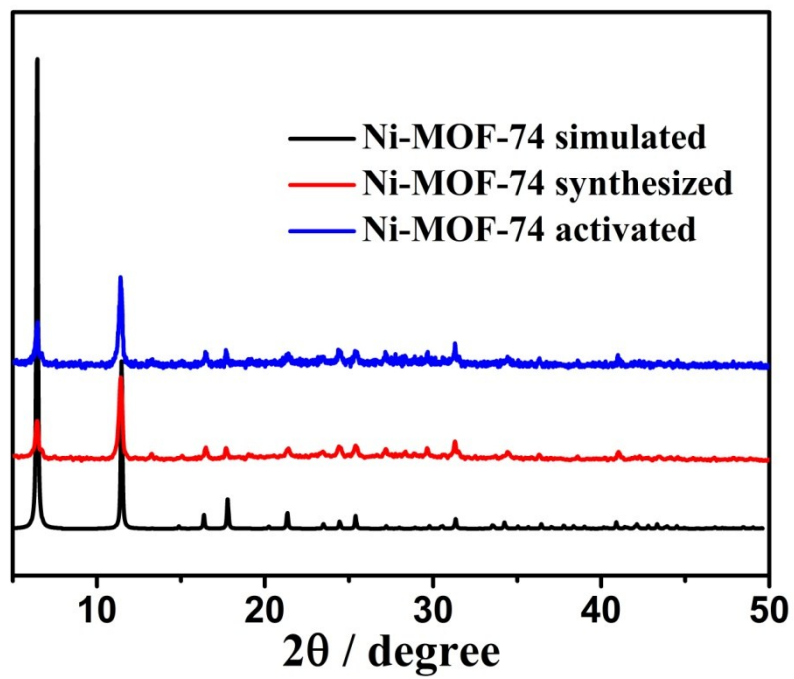

Fig. S2 XRD patterns of as-prepared and activated Ni-MOF-74.
